# Supplementary material for: Candidate Genes Involved in Tolerance to Fenoxaprop-P-Ethyl in Rice Induced by Isoxadifen-Ethyl Hydrolysate
Source: MDPI journal article supplement (doi:10.3390/agronomy13010225), 2023-01-11
Supplement: s1 [file s1]

## Supplementary Materials

**Table S1.** Primers sequence used in qRT-PCR.

|                                             | Gene ID      | Primers sequences (5'-3') |                          |
|---------------------------------------------|--------------|---------------------------|--------------------------|
|                                             |              | Forward                   | Reverse                  |
| RNA-Seq<br>verify                           | Os03g0757000 | GCGGAAGGGCAGCACATCAT      | TGGAAGGAGTTGCAGACGGTCAT  |
|                                             | Os10g0530900 | CGCAGGTCATCGTGCAGTACATCG  | TCTCCTCCTCCGTCTTGCTCCC   |
|                                             | Os01g0696701 | GACCTGGCCGAAGATGACGG      | CACGGACCTGCTGCTGATGG     |
|                                             | Os01g0692100 | CTCCTCCCTGCCGATCCCTA      | ACCTGAACAGCACTTTCCACGAC  |
|                                             | Os01g0949750 | CTGCTGCTCAACCACAACCC      | GCTTCCCTCACGAAACAATCC    |
|                                             | Os04g0178400 | CAAGAGCCCACAAGACCACG      | GCCCTCCACAATCTCATACCCT   |
|                                             | Os04g0570500 | CCTAGTTGCCAAGAAGTTGA      | ATCGGTAGAATGATGTCCCT     |
|                                             | Os01g0854800 | GGGCACAAGGTGGAGCAGAAG     | GTGGTAGTCGGTATCACGAGGGAG |
|                                             | Os01g0356400 | CTTCCAGAGTATGTCGGTTTGTCG  | CTGCCTCAGATGGGATGTTCCG   |
|                                             | Os01g0173900 | TTCAACGGATCAAAGCGAAGT     | TACCAGAAGCAGGCAGCAAG     |
|                                             | Os04g0206500 | AACCGCATGGGAGATTGGTG      | TTGTGCTGCTTCCTTGGCTTT    |
|                                             | Os07g0606800 | TCCGCGTCAGGATGTTCTTTCCG   | CCGCCTTGCCGTCGTCGTAG     |
|                                             | Os05g0295300 | CTCAGAATGGCTGCGAAAGG      | GATTGCTGGTTGGTGGGAAA     |
|                                             | Os01g0628700 | TGGTGGACAAGTGGAAGGTTT     | ACCTAAACCAGCCGTCCACATA   |
|                                             | Os11g0635500 | AGCATGGTGAGGCAGGTGTT      | CGGCTCATCAGCACGCTTCAT    |
|                                             | Os08g0508000 | CCTCGTGTCTGAACGCCTTCTT    | AAACGGCTGTTGGTTATGTTGTCC |
| Potential FE<br>metabolic-rela<br>ted genes | Os10g0530900 | CGCAGGTCATCGTGCAGTACATCG  | TCTCCTCCTCCGTCTTGCTCCC   |
|                                             | Os11g0441500 | TTCGGCACCCCTCGTCTCCAT     | GTGGACTACTAGGAGGGAGACG   |
|                                             | Os03g0757000 | GCGGAAGGGCAGCACATCAT      | TGGAAGGAGTTGCAGACGGTCAT  |
|                                             | Os06g0220500 | GTCGTTGTCGTTGGCGTTGGC     | GCTTCAGCGTCGGGTTGATGTG   |
|                                             | Os02g0208300 | ACAGCACTGATGGGTGTTAG      | TCATGTCTCCCTGAGCATTT     |
|                                             | Os01g0696600 | CACGGACCTGCTGCTGATGG      | TGACCTGGCCGAAGATGACG     |
|                                             | Os01g0696701 | GACCTGGCCGAAGATGACGG      | CACGGACCTGCTGCTGATGG     |
|                                             | Os02g0634700 | CCTGGGTGTTTCGTCTGTTGG     | GTCGCTACATCTTCAGCACTCTAA |
|                                             | Os01g0332800 | GTCAACAATGTTTGCGACTT      | TTATCGTGCCTAGTATGGGA     |

|           |              |                       |                      |
|-----------|--------------|-----------------------|----------------------|
|           | Os08g0191700 | GTGGTATGGCTCCTGTCTTC  | TTAGACGCCACTATTAGACC |
| Reference | <i>UBQ5</i>  | ACCACTTCGACCGCCACTACT | ACGCCTAAGCCTGCTGGTT  |
| gene      |              |                       |                      |

**Table S2.** Summary of rice transcriptome sequencing, assembly, and comparison with the reference genome.

| Samples | Clean reads | Mapped<br>Reads        | Uniq Mapped<br>Reads   | Multiple<br>Mapped Reads | GC Content<br>(%) | %≥Q30 |
|---------|-------------|------------------------|------------------------|--------------------------|-------------------|-------|
| RCK-1   | 25,092,502  | 46,334,056<br>(92.33%) | 44,988,139<br>(89.64%) | 1,345,917<br>(2.68%)     | 51.98             | 93.79 |
| RCK-2   | 23,520,406  | 43,647,138<br>(92.79%) | 42,467,880<br>(90.28%) | 1,179,258<br>(2.51%)     | 51.82             | 93.48 |
| RCK-3   | 26,325,799  | 48,726,936<br>(92.55%) | 47,370,320<br>(89.97%) | 1,356,616<br>(2.58%)     | 52.41             | 93.52 |
| RCK-4   | 25,490,533  | 47,292,009<br>(92.76%) | 45,999,229<br>(90.23%) | 1,292,780<br>(2.54%)     | 52.22             | 93.77 |
| RT1-1   | 25,335,658  | 46,879,095<br>(92.52%) | 45,542,012<br>(89.88%) | 1,337,083<br>(2.64%)     | 52.78             | 93.81 |
| RT1-2   | 23,415,165  | 43,415,648<br>(92.71%) | 42,254,003<br>(90.23%) | 1,161,645<br>(2.48%)     | 53.08             | 93.98 |
| RT1-3   | 23,906,937  | 44,183,421<br>(92.41%) | 42,935,155<br>(89.80%) | 1,248,266<br>(2.61%)     | 52.13             | 93.56 |
| RT1-4   | 25,359,466  | 46,940,887<br>(92.55%) | 45,588,994<br>(89.89%) | 1,351,893<br>(2.67%)     | 51.86             | 93.54 |
| RT2-1   | 23,859,190  | 44,010,959<br>(92.23%) | 42,739,241<br>(89.57%) | 1,271,718<br>(2.67%)     | 51.47             | 93.61 |
| RT2-2   | 24,290,301  | 44,837,627<br>(92.30%) | 43,621,690<br>(89.79%) | 1,215,937<br>(2.50%)     | 51.83             | 93.55 |
| RT2-3   | 21,882,776  | 40,360,224             | 39,255,820             | 1,104,404                | 52.44             | 93.5  |

|       |            |            |            |           |       |       |
|-------|------------|------------|------------|-----------|-------|-------|
|       |            | (92.22%)   | (89.70%)   | (2.52%)   |       |       |
| RT2-4 | 25,841,069 | 47,853,634 | 46,521,532 | 1,332,102 | 51.79 | 93.82 |
|       |            | (92.59%)   | (90.01%)   | (2.58%)   |       |       |
| SCK-1 | 21,101,964 | 39,168,519 | 37,963,537 | 1,204,982 | 50.58 | 93.52 |
|       |            | (92.81%)   | (89.95%)   | (2.86%)   |       |       |
| SCK-2 | 20,741,692 | 38,509,459 | 37,358,069 | 1,151,390 | 50.93 | 93.91 |
|       |            | (92.83%)   | (90.06%)   | (2.78%)   |       |       |
| SCK-3 | 23,246,118 | 43,023,811 | 41,752,747 | 1,271,064 | 51.83 | 93.72 |
|       |            | (92.54%)   | (89.81%)   | (2.73%)   |       |       |
| SCK-4 | 23,198,848 | 42,849,585 | 41,549,271 | 1,300,314 | 50.99 | 93.68 |
|       |            | (92.35%)   | (89.55%)   | (2.80%)   |       |       |

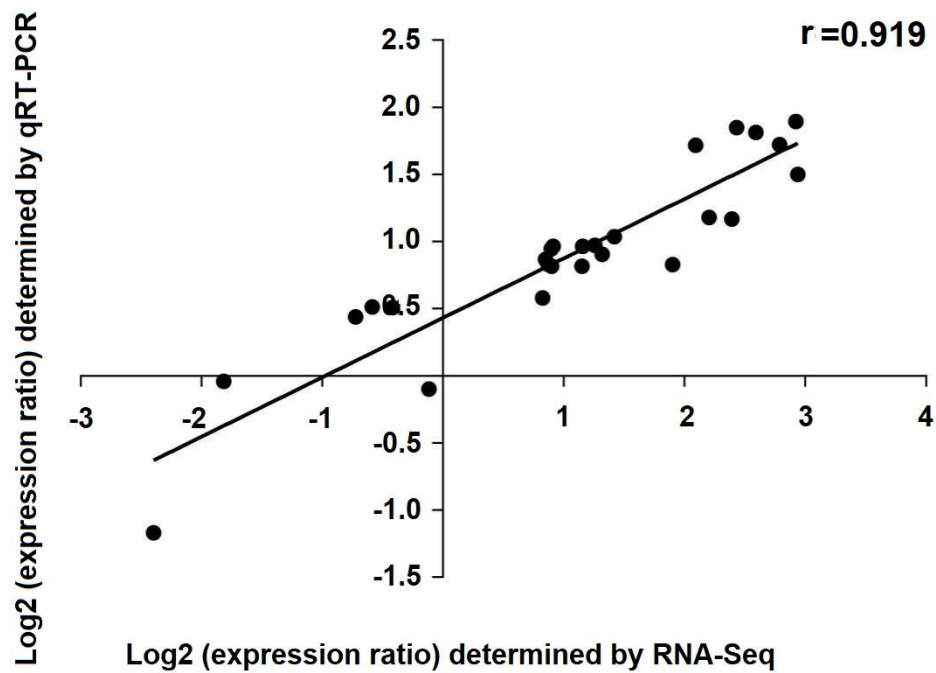

**Figure S1.** Correlation between qRT-PCR and RNA Seq results. A simple linear regression between the RNA-Seq data and the qRT-PCR validation was shown in scatterplots. The correlation coefficient was expressed in  $r$ .
